# Supplementary material for: Functional interplay between the cell cycle and cell phenotypes
Source: Royal Society of Chemistry journal article supplement (doi:10.1039/c2ib20246h), 2013-01-14
Supplement: c2ib20246h.pdf [file c2ib20246h.pdf]

## Supplemental figures legends

**Fig. S1. Cell cycle distributions of MD-MB-231 cells were verified by flow cytometry (FC) analysis.** **A.** Cell cycle distribution of human breast cancer cells (MDA-MB-231) were measured by both FC and the microscopy assay. The number of analyzed cells is indicated in each panel. **B.** Fractions of cells in each phase of the cell cycle quantified with our microscopy-based assay and compared to FC.

**Fig. S2. Cell cycle analysis applied to a wide range of cell types.** To demonstrate the versatility of our method, seven additional types of cells were analyzed. These cells include human pancreatic normal epithelial cells (HPNE), human breast normal epithelial cells (MCF10A), patient-derived pancreatic cancer ductal adenocarcinoma cells that metastasized to the liver, *LMNA*<sup>+/+</sup> mouse embryonic fibroblasts (MEFs), *LMNA*<sup>-/-</sup> MEFs, metastatic breast cancer cells (MD-MB-231), and patient-derived pancreatic cancer ductal adenocarcinoma cells from the primary tumor. At least 1,000 cells were analyzed for each cell line.

**Fig. S3. Alteration of cell cycle causes long term effects on cell properties. A and B.** Asynchronized cell cycle distribution is recovered after 24h release of from synchronizing drug. Orange represents thymidine treatment (A); purple represents nocodazole treatment (B). **C and D.** Mean changes in nuclear size and cell size induced 0h, 6h, and 24h after release of thymidine (C, orange) and nocodazole (D, purple) compared to control cells (blue). \*\*\*:  $P < 0.0001$  (one-way ANOVA). **E.** Cell-cycle distributions of control cells and cells treated with Cdk4/6 inhibitor IV. Blue represents control. Black represents Cdk4/6 inhibitor IV treatment. **F.** Mean changes in nuclear size and cell size induced 0h, 6h, and 24h after removing Cdk4/6 inhibitor IV. Three biological repeats on different cells were analyzed for a total of >3,000 cells for each tested condition.

**Fig. S4. Lamin deficiency enriches cells in the G<sub>0</sub>/G<sub>1</sub> phase.** **A.** Cell cycle distributions of *LMNA*<sup>-/-</sup> MEFs and Lamin A/C KD c2c12 cells compared to *LMNA*<sup>+/+</sup> MEFs and control c2c12 cells transfected with a scrambled construct, respectively, obtained by the microscopy assay. **B.** Quantitative analysis demonstrates significant ( $P < 0.0001$ ) increase in the G<sub>0</sub>/G<sub>1</sub> fractions and decrease in the G<sub>2</sub>/M fractions of both *LMNA*<sup>-/-</sup> MEFs and Lamin A/C KD c2c12 cells compared to control cells. **C.** Relative contributions to population-averaged changes in nuclear size of *LMNA*<sup>-/-</sup> MEFs and Lamin A/C KD c2c12 cells show only ~75%

contribution from direct intrinsic nuclear size changes. The rest of ~25% is contributed from re-distribution of cell cycle and the second order term. At least 1,000 cells were analyzed in three biological repeats (different cells are analyzed each time) for a total of >3,000 cells for each cell line.
