# Supplementary material for: Functional interplay between the cell cycle and cell phenotypes
Source: Royal Society of Chemistry journal article supplement (doi:10.1039/c2ib20246h), 2013-01-14
Supplement: c2ib20246h_2.pdf [file c2ib20246h_2.pdf]

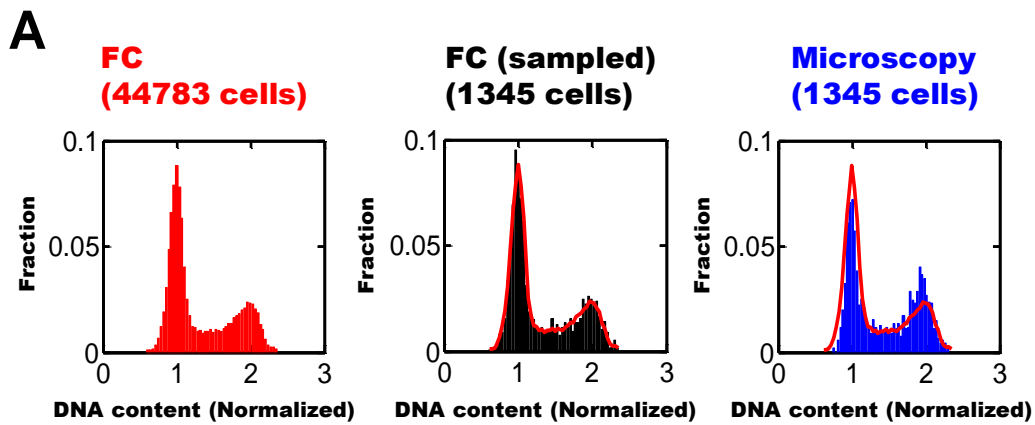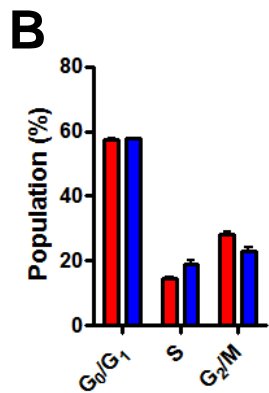

**Human pancreatic normal epithelial (HPNE)**

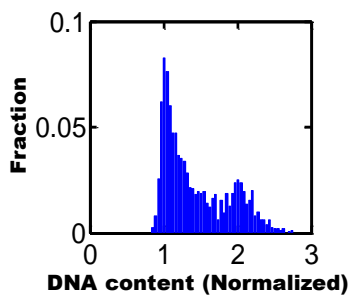

**MEF *Lmna*<sup>+/+</sup>**

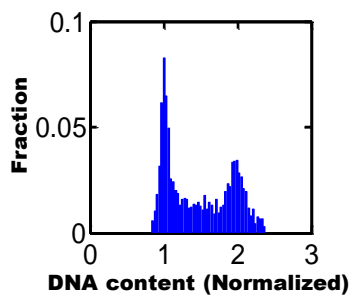

**MCF-10A**

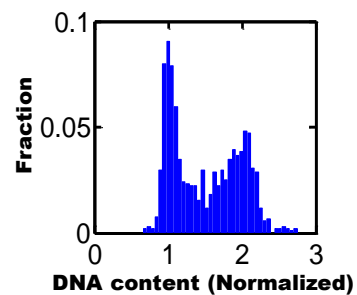

**Patient derived pancreatic ductal adenocarcinomas (liver metastases)**

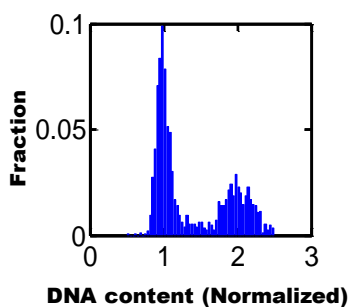

**MEF *Lmna*<sup>-/-</sup>**

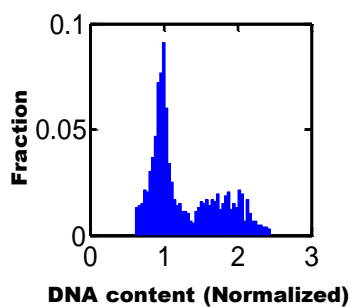

**MDA-MB-231**

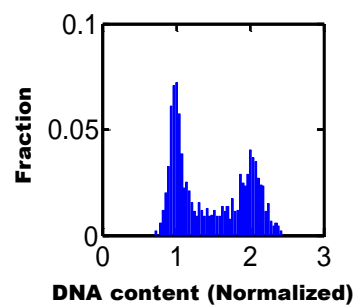

**Patient derived pancreatic ductal adenocarcinomas (primary tumor)**

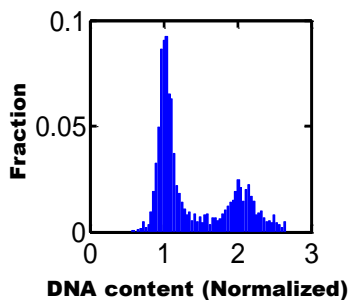

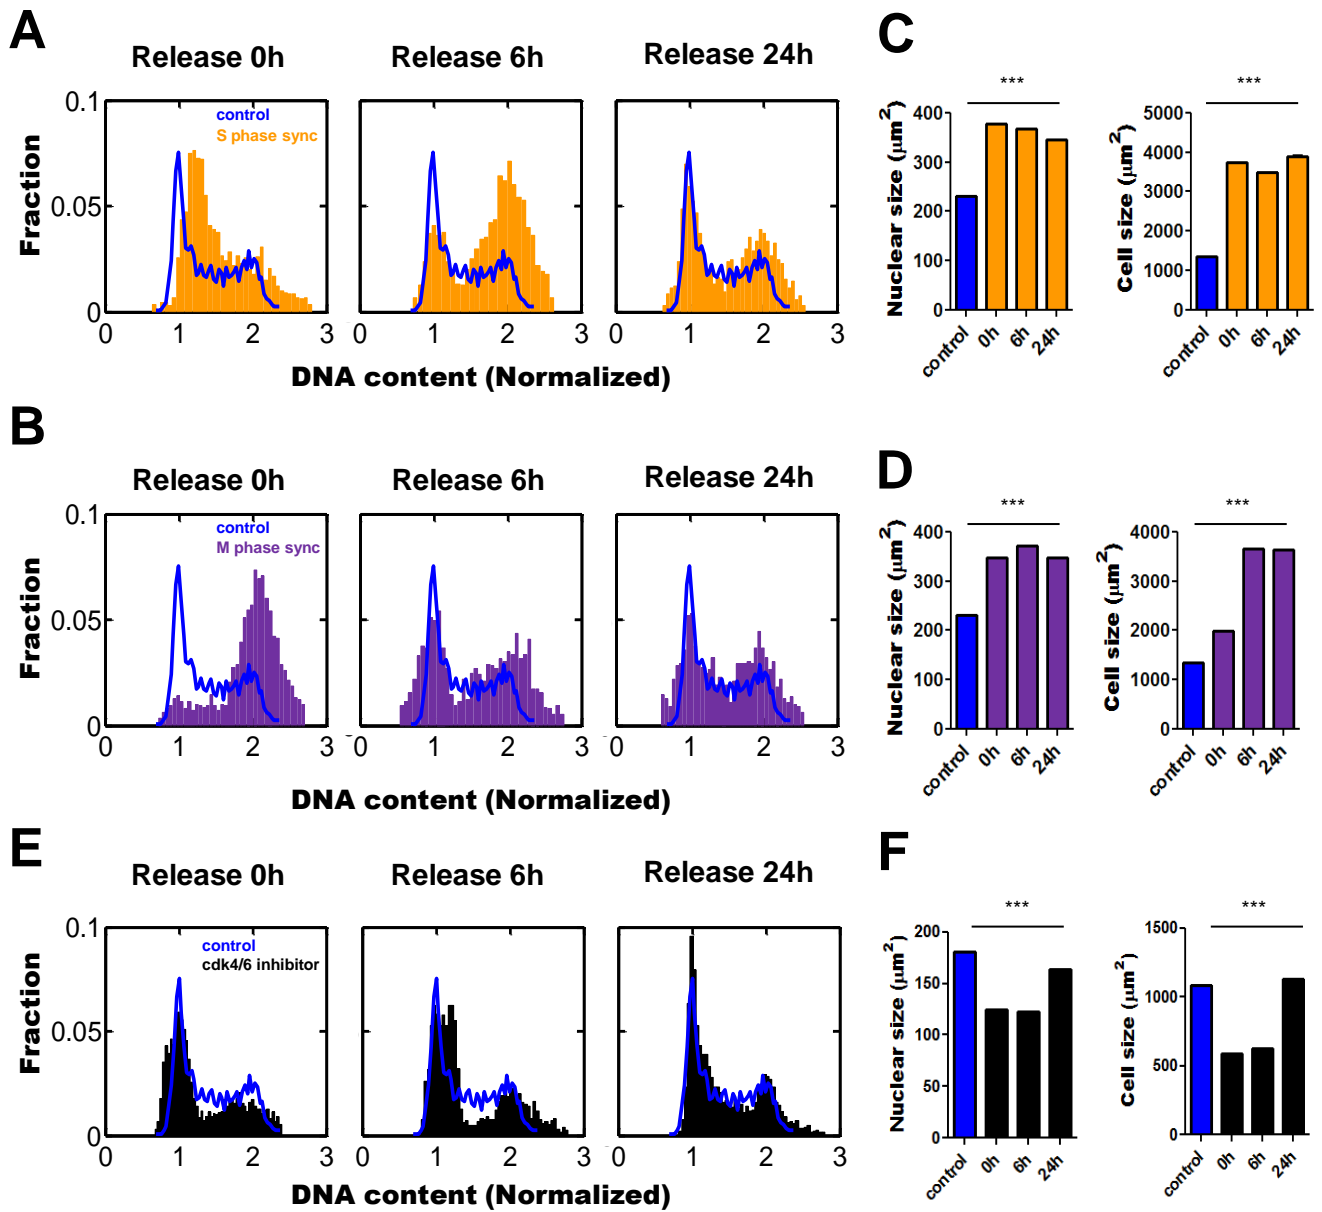

Fig S3. Chen et al.

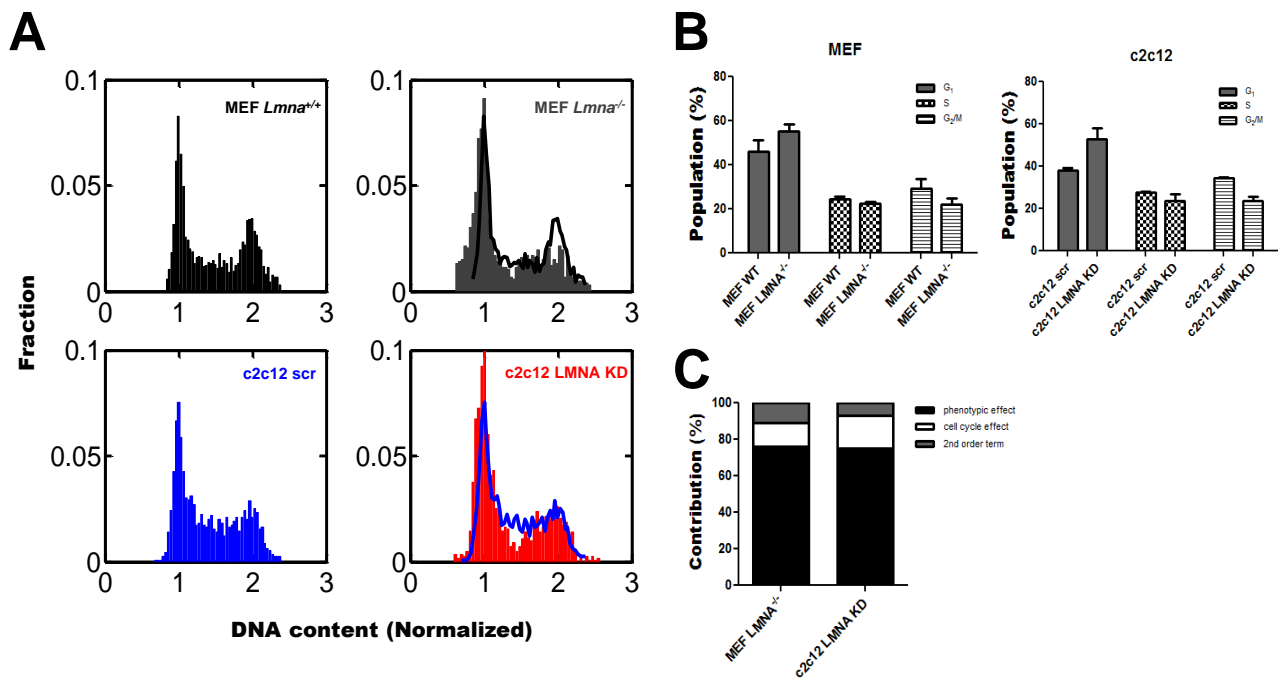

**Fig S4. Chen et al.**
